# Supplementary material for: A Z-scheme inorganic intergrowth bulk heterojunction to achieve photostimulated oxygen vacancy regeneration for photocatalytic CO2 reduction
Source: Royal Society of Chemistry journal article supplement (doi:10.1039/d4ta07520j), 2024-11-27
Supplement: d4ta07520j1.pdf [file d4ta07520j1.pdf]

# The Z-scheme inorganic intergrowth bulk heterojunction to achieve the photostimulated oxygen vacancy regeneration for photocatalytic CO<sub>2</sub> reduction

Yuexian Li<sup>a, b, c</sup>, Wei Zou<sup>b, c</sup>, Xiaoyan Wang<sup>a</sup>, Jun Lu<sup>\*a</sup>, Weiwei Liu<sup>\*b, c</sup>, Shuo Wei<sup>\*d</sup>

<sup>a</sup>State Key Laboratory of Chemical Resource Engineering and College of Chemistry, Beijing University of Chemical Technology, P. Box 98, Beisanhuan East Road 15, Beijing 100029, P. R.

<sup>b</sup>China State Key Laboratory of New Technology of non-ferrous Metal Strengthening Metallurgy, Kunming Metallurgical Research Institute, Huayun Road 1, Kunming, Yunnan 650051, P. R. China.

<sup>c</sup>Resource Comprehensive Utilization Research Institute, Kunming Metallurgical Research Institute, Yuantong North Road 86, Kunming, Yunnan 650031, P. R. China.

<sup>d</sup>College of Chemistry, Beijing Normal University, Xijiekou Outside Street 19, Beijing 100875, P. R. China

1. Methods
2. Characterization
3. Computational Methods
4. Defect structure discussion
5. Table and Figure

## Methods

### Synthesis of NiTiGa-LDHs precursor.

NiTiGa-LDHs were synthesized by the urea hydrothermal method. 10 mmol nickel (II) nitrate hexahydrate ( $\text{Ni}(\text{NO}_3)_2 \cdot 6\text{H}_2\text{O}$ ), 1.25 mmol gallium (III) nitrate hydrate ( $\text{Ga}(\text{NO}_3)_3 \cdot x\text{H}_2\text{O}$ ), and 3.75 mmol dihydroxybis(ammonium lactato) titanium (IV) ( $\text{Ti}(\text{OH})(\text{OOCCH}_2\text{CH}_2\text{OH})_2(\text{NH}_2\text{OH})_2$ ) solution were dissolved in 80 mL absolute methanol. Subsequently, 0.5 g of urea was added and sonicated for 10 min until complete dissolution. The above mixed solution was transferred into a 150 mL tetrafluoroethylene autoclave liner and reacted at 120 °C for 24 h. Finally, the product was washed for three times with ethanol and deionized water and freeze-dried for 6 h, respectively to obtain NiTiGa-LDHs powder. For exploring the effects of different molar ratio of  $\text{Ni}^{2+}$  and  $\text{Ti}^{4+}$  ions on the preparation of IIBH, NiTiGa-LDHs were synthesized by changing the molar ratios of  $\text{Ni}^{2+}$ ,  $\text{Ti}^{4+}$ , and  $\text{Ga}^{3+}$  ( $\text{Ni}^{2+} : \text{Ti}^{4+} : \text{Ga}^{3+} = 10 : 1.25 : 1.25, 10 : 3.75 : 1.25, 10 : 6.25 : 1.25$ ). Similarly, the synthesis method of NiGa-LDHs and NiTi-LDHs was consistent with the above method.

### Synthesis of IIBH NiO(Ti)/Ti<sub>3</sub>O<sub>5</sub>(Ni,Ga).

NiO(Ti)/Ti<sub>3</sub>O<sub>5</sub>(Ni,Ga) was prepared by two-stage topological pyrolysis (TTP) method. NiTiGa-LDHs with varying molar ratios were heated in a crucible at 350 °C for 8 hours with a heating rate of 10 min/°C in a muffle furnace, denoted as NiTiGa-MMO. The calcined NiTiGa-MMO was dispersed in 80 mL deionized water containing 0.3 g urea with ultrasounding for 10 min until complete dispersion. The dispersion mentioned above heated at 120 °C inside a 150 mL tetrafluoroethylene autoclave liner for 6 h. After three rounds of washing with deionized water and ethanol, it was finally freeze-dried for 6 hours, resulting in TiO<sub>x</sub>@NiGa-LDHs. The recovery time has also been tested for 1 h, 3 h, 5 h, 7 h, 9 h, 12 h, 24 h, and 36 h, respectively. Finally, the above products were calcined at 150 °C, 250 °C, 350 °C, 450 °C, 550 °C, 650 °C, 750 °C or 850 °C for the second time, denoted as NiO(Ti)/Ti<sub>3</sub>O<sub>5</sub>(Ni,Ga).

## Characterization.

Powder X-ray diffraction (XRD) using Cu K radiation ( $\lambda = 0.154$  nm, 40 kV, and 40 mA) on the Rigaku Ultima III diffractometer was used to explore crystal structure identification. The scan speed was  $10^\circ \text{ min}^{-1}$ , and the  $2\theta$  range was  $5^\circ$  to  $70^\circ$ . Transmission electron microscopy (TEM, JEM-3010) and scanning electron microscopy (SEM, Zeiss) were used for analyzing the morphology of the photocatalysts. Using a Hitachi U-3900H spectrophotometer and white  $\text{BaSO}_4$  as the reflection standard, UV-Visible diffuse reflectometry (UV-DRS) was used to examine the photocatalyst's light absorption characteristics. The functional group of the materials was identified using the Fourier transform infrared spectrometer (FT-IR, TENSOR II). Utilizing a Thermo Fisher Scientific ESCALAB 250, X-ray photoelectron spectroscopy (XPS) examination was carried out, and  $\text{Al K}\alpha = 1486$  eV radiation was employed to investigate the surface composition and chemical valence states. Similar circumstances were used for in-situ irradiation XPS measurements, however UV-visible light irradiation was added. The HITACHIF-4600 fluorescence spectrophotometer was used to examine the PL spectra of each sample. The Beijing Synchrotron Radiation Facility (BSRF) used the 1W1B beamline and a double crystal Si (111) monochromator to produce X-ray absorption fine structure (XAFS) investigations.

**Electrochemical testing.** The electrochemical workstation (CHI660E) with a three-electrode setup and a spinning ring disk was used for the electrochemical impedance spectroscopy (EIS) testing. The electrolyte was pH = 6.8, 0.1 M  $\text{Na}_2\text{SO}_4$  aqueous solution. The reference electrode and counter electrode were  $\text{Hg}/\text{Hg}_2\text{Cl}_2$  and graphite electrode, respectively. In 485  $\mu\text{L}$  of deionized water and 485  $\mu\text{L}$  of ethanol, 10 mg of various catalyst samples were scattered with 30  $\mu\text{L}$  of nafion as adhesive. The samples were uniformly deposited on a glassy carbon electrode after an ultrasonic dispersion period of 10 min. Without applying bias voltage, the photocurrent response was utilized to measure the current produced by the sample in either bright or dark conditions. Using the Mott-Schottky plot, the flat band potential ( $V_{\text{fb}}$ ) in the semiconductor space charge area was computed.

**Photocatalytic reduction of  $\text{CO}_2$  experiment.** In a 100 mL quartz photocatalytic reaction cell, 30 mg of photocatalysts were dissolved in 35 mL of deionized water using an ultrasonic dispersion technique for 10 minutes. The reaction cell was then cycled with  $\text{CO}_2$  pure gas for 30 minutes. In order to reduce  $\text{CO}_2$  and keep the entire photocatalytic system at room temperature, a  $300 \text{ mW}/\text{cm}^2$  xenon lamp was employed. Gas chromatography (GC-7920, TDX-01 packed column) with a flame ionization detector (FID) as  $\text{N}_2$  carrier gas was used to monitor the gas products. For each catalyst, at least three parallel tests were conducted to guarantee the correctness of the photocatalytic test data.

**In-situ fourier transform infrared spectroscopy on  $\text{CO}_2$  reaction experiment.** The  $\text{BaF}_2$  window and MCT detector were installed in the Nicolet 6700 in-situ fourier transform infrared spectrometer. The device has a measuring range of  $4000$  to  $400 \text{ cm}^{-1}$ . The measuring mode employed was diffuse reflection. First,  $\text{CO}_2$  and  $\text{H}_2\text{O}$  that had been adsorbed on the catalyst's surface were removed using high-pure He. The in-situ spectroscopic cell was filled with the photocatalyst,  $\text{N}_2$  gas was continually added, and the temperature was controlled to rise from

ambient temperature to 100 °C at a rate of 10 °C/minute for 40 min. At room temperature, blank background data was gathered before high-purity CO<sub>2</sub> and water vapor were bubbled into the in-situ spectroscopic cell. CO<sub>2</sub> gas flowed at a rate of 10 ml/min. To produce the spectra of the CO<sub>2</sub> reaction after the various illumination times, the spectra were taken at intervals of 2 min and exposed to radiation for 30 min. Condensing the flowing water and maintaining room temperature in the in-situ spectroscopic cell allowed the entire reaction to be carried out.

## Computational Methods.

Kubelka-Munk formula and Tauc's plot to estimate the band gap as follow:

$$(ah\nu)^{1/n} = A (h\nu - E_g)$$

Calculate  $(ah\nu)^{1/n}$  and  $h\nu$  respectively, where for the direct band gap  $n = 1/2$  and for the indirect band gap  $n = 2$ . By plotting  $h\nu$  and  $(ah\nu)^{1/n}$  as transverse and vertical coordinates, and extrapolating from the x-axis intercept, the band gap energy was obtained. Among them,  $A$ ,  $h$ ,  $\alpha$ ,  $\nu$ , and  $E_g$  were proportionality constant, Plank constant, absorption coefficient, light frequency, and band gap energy, respectively.

The valence band potential ( $E_{VB}$ ) can be calculated as:

$$E_g = E_{CB} - E_{VB}$$

The spin-polarized density functional theory (DFT) calculations were performed at the level of generalized gradient approximation (GGA) Perdew-Burke-Ernzerhof (PBE) through the CASTEP module in Materials Studio 5.5 (Accelrys software Inc., San Diego, CA). The ultrasoft pseudopotentials were used to characterize the ionic cores of Ni, Ti, O. The cut-off energy and k-points were set as 400 eV and  $1 \times 1 \times 1$ , respectively. BFGS geometry scheme was used to search the minimum point of the potential energy surface. The three convergence criteria of geometric optimization are as follows: (1) the energy tolerance of  $1 \times 10^{-5}$  eV/atom; (2) maximum displacement tolerance of  $1 \times 10^{-3}$  Å; (3) maximum force tolerance of  $3 \times 10^{-2}$  eV/Å. The equation for the NiO(Ti)/Ti<sub>3</sub>O<sub>5</sub>(Ni,Ga) electron density difference is:

$$\Delta\rho = \rho(\text{NiO(Ti)/Ti}_3\text{O}_5(\text{Ni,Ga})) - \sum(\rho_i)$$

where  $\rho(\text{NiO(Ti)/Ti}_3\text{O}_5(\text{Ni,Ga}))$  represents the total electronic density of the simulation model and  $\rho_i$  is the electronic density of each individual atom in the model.

We photographed the interface of the IIBH in the HRTM, which by measurement is thought to be the NiO (200) plane and  $\beta$ -Ti<sub>3</sub>O<sub>5</sub> (020) plane, so the (100) face of NiO and the (010) face of  $\beta$ -Ti<sub>3</sub>O<sub>5</sub> were cleaved to construct IIBH NiO(Ti)/Ti<sub>3</sub>O<sub>5</sub>(Ni,Ga) model. The lattice parameters for the NiO model that had been first tuned were  $a = b = 4.177$  Å. The optimal lattice parameters for the  $\beta$ -Ti<sub>3</sub>O<sub>5</sub> model were  $a = c = 9.757$  Å and  $b = 3.802$  Å. Based on the optimization geometry of the bulk NiO, a tangent was made along the (100) crystal plane and a vacuum layer with a thickness of 15 Å was added in the z-direction to form a flat plate structure with polyatomic layers.

All the computations were performed based on the density functional theory (DFT) methods, as implemented in the plane wave set Vienna ab initio Simulation Package (VASP) code.<sup>1</sup> The exchange-correlation functional in the Perdew-Burke-Ernzerhof (PBE) form within a generalized gradient approximation (GGA) was used.<sup>2, 3</sup> The projected augmented wave (PAW) potential<sup>4, 5</sup> was selected to describe the ionic cores and take valence electrons

into account using a plane wave basis set with a kinetic energy cut-off of 450 eV. The convergence threshold for the iteration in the self-consistent field (SCF) was set as  $10^{-5}$  eV. The geometry optimization within the conjugate gradient method was performed with forces on each atom less than 0.01 eV/Å. To prevent the periodic image interactions, a large vacuum layer of 20 Å was inserted in the z-direction. The Monkhorst-Pack k-point meshes are  $3 \times 3 \times 1$  in the geometry optimization and .

Gibbs free energies for each gaseous and adsorbed species were calculated according to the Expression:

$$G = E_{\text{DFT}} + E_{\text{ZPE}} - TS$$

where  $E_{\text{DFT}}$  and  $E_{\text{ZPE}}$  are the total energy and zero-point energy calculated with VASP, TS is the entropy contribution at 298.15 K.

### Defect structure discussion.

According to the Kroge-Mink rule, the intrinsic defect equation for the coexistence of  $\text{Ti}^{3+}$  and  $\text{Ti}^{4+}$  in  $\text{Ti}_3\text{O}_5$  is:

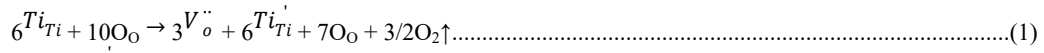

where  $\overset{\cdot}{\text{Ti}}$  is represented as  $\text{Ti}^{3+}$ , which takes the place of  $\text{Ti}^{4+}$  and acquires a negative charge along with a decrease in the quantity of lattice oxygen ions. The electron that  $\text{Ti}^{4+}$  gains to form  $\text{Ti}^{3+}$  is in fact an extra electron bound to the oxygen ion vacancy ( $V_\text{O}^{\cdot\cdot}$ ) since it is not fixed on a specific Ti ion but rather can move from one nearby  $\text{Ti}^{4+}$  ion to another. The resulting Eq. (1) can be abbreviated as:

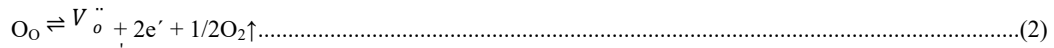

where  $[\overset{\cdot}{\text{Ti}}] = [e']$ , meaning that the production of oxygen ion vacancies—which appear as quasi-free electrons to maintain the electroneutrality of the crystal structure—and the escape of oxygen atoms from the crystal in the form of gas are the processes involved in the formation of suboxide. The electrons are able to migrate between adjacent oxygen vacancies. Consequently, the defect equilibrium constant of  $\text{Ti}_3\text{O}_5$  is:

$$K = \frac{[V_\text{O}^{\cdot\cdot}][e']p_{\text{O}_2}^{1/2}}{[\text{O}_\text{O}]} \dots \dots \dots$$

(3)

where the electron concentration  $[e']$  in  $\text{Ti}_3\text{O}_5$  crystals is proportional to the oxygen vacancy concentration  $[V_\text{O}^{\cdot\cdot}]$ , i.e.:

$$[V_\text{O}^{\cdot\cdot}] = 2[e'] \dots \dots \dots (4)$$

For this reason, the titanium suboxide  $\text{Ti}_3\text{O}_5$  can be used as an ideal model for  $V_\text{O}^{\cdot\cdot}$  studies and regeneration.<sup>6</sup>

First, it was discussed that NiO in IIBH could be doped by  $\text{Ga}^{3+}$  in the high valence state with the defect equation:

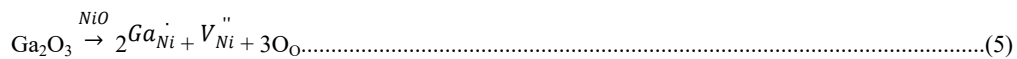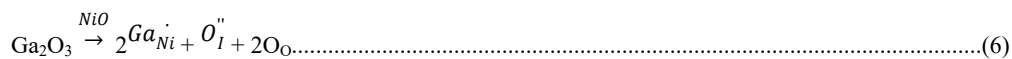

When  $\text{Ga}^{3+}$  ( $r = 62$  pm) with smaller ionic radius replaces doped NiO ( $r = 69$  pm), there were two possible ways of charge compensation.  $\text{Ni}^{2+}$  vacancies were formed in Eq. (5), i.e.  $V_{\text{Ni}}^{\cdot\cdot}$ , and oxygen ion interstitial was formed in Eq. (6), i.e.,  $\text{O}_\text{I}^{\cdot\cdot}$ . XRD research revealed that the lattice of NiO expanded in IIBH, whereas lattice contraction resulted from the creation of metal ion vacancies caused by small-radius  $\text{Ga}^{3+}$  doping. Although oxygen ions on the lattice interstitial sites expanded the lattice, this was contrary to the thermodynamic stability of

the crystal. So, the lattice distortion of NiO was not necessarily caused by Ga<sup>3+</sup> doping.

Then, when  $\beta$ -Ti<sub>3</sub>O<sub>5</sub> in IIBH is doped by Ga<sup>3+</sup>, there was a substitution of Ti<sup>3+</sup> or Ti<sup>4+</sup>. This was discussed below in terms of Ti<sup>4+</sup> due to the fact that heterovalent doping produces charge-compensated point defects:

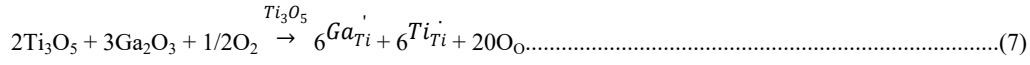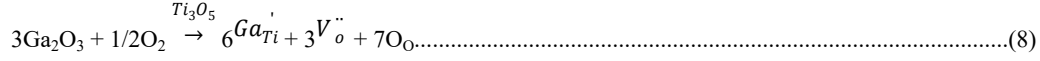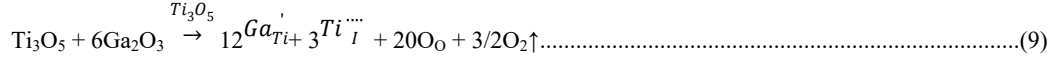

$\beta$ -Ti<sub>3</sub>O<sub>5</sub> was doped by substitution of Ga<sup>3+</sup> ( $r = 62$  pm) with smaller ionic radius and there were three possible ways of charge compensation. Eq. (7) with Ti<sup>4+</sup> downgraded to Ti<sup>3+</sup>, i.e.  $\overset{\cdot}{\text{Ti}}_{\text{Ti}}$ . Eq. (8) with the formation of oxygen ion vacancies, i.e.  $\overset{\cdot\cdot}{\text{V}}_{\text{O}}$ ; and Eq. (9) with the formation of metal ion interstitials, i.e.  $\overset{\cdot\cdot\cdot}{\text{Ti}}_{\text{I}}$ . However, the  $\overset{\cdot\cdot\cdot}{\text{Ti}}_{\text{I}}$  expanded the lattice, so the defect did not exist. Small radius Ga<sup>3+</sup> caused lattice contraction either by Ti ion valence change or formation of  $\overset{\cdot\cdot}{\text{V}}_{\text{O}}$ , which was consistent with the direction of  $\beta$ -Ti<sub>3</sub>O<sub>5</sub> shift in XRD.<sup>7</sup>

**Table S1.** Local structure parameters around Ti estimated by EXAFS analysis.

| Sample                                         | Shell                 | S <sub>0</sub> <sup>2</sup> N <sup>[a]</sup> | R[Å] <sup>[b]</sup> | σ <sup>2</sup> [10 <sup>-3</sup> Å <sup>2</sup> ] <sup>[c]</sup> | ΔE <sub>0</sub> | R-factor (10 <sup>-3</sup> ) |
|------------------------------------------------|-----------------------|----------------------------------------------|---------------------|------------------------------------------------------------------|-----------------|------------------------------|
| NiTiGa-LDHs                                    | Ti-O                  | 6.0                                          | 1.37 ± 0.01         | 4.22                                                             | 0.1             | 9.32                         |
|                                                | Ti-O-M <sup>[d]</sup> | 6.0                                          | 2.45 ± 0.01         | 4.91                                                             | 0.1             |                              |
| NiTiGa-MMO                                     | Ti-O                  | 5.77                                         | 1.31 ± 0.01         | 4.62                                                             | 0.3             | 10.19                        |
|                                                | Ti-O-M                | 5.81                                         | 2.48 ± 0.01         | 4.77                                                             | 0.2             |                              |
| TiO <sub>x</sub> @NiGa-LDHs                    | Ti-O                  | 5.32                                         | 1.35 ± 0.01         | 5.15                                                             | -0.5            | 10.73                        |
|                                                | Ti-O-M                | 5.43                                         | 2.52 ± 0.01         | 5.67                                                             | -0.2            |                              |
| NiO(Ti)/Ti <sub>3</sub> O <sub>5</sub> (Ni,Ga) | Ti-O1                 | 5.15                                         | 1.30 ± 0.01         | 6.87                                                             | 0.1             | 11.59                        |
|                                                | Ti-O2                 | 5.29                                         | 1.88 ± 0.01         | 5.03                                                             | 0.9             |                              |
|                                                | Ti-O-Ti               | 5.11                                         | 2.59 ± 0.01         | 6.08                                                             | 0.7             |                              |
| TiO <sub>2</sub>                               | Ti-O                  | 6.0                                          | 1.45 ± 0.01         | 3.11                                                             | 0.1             | 8.62                         |
|                                                | Ti-O-Ti               | 6.0                                          | 2.69 ± 0.01         | 3.56                                                             | 0               |                              |
| Ti <sub>3</sub> O <sub>5</sub>                 | Ti-O                  | 5.0                                          | 1.52 ± 0.01         | 3.20                                                             | 0.1             | 8.47                         |
|                                                | Ti-O-Ti               | 5.0                                          | 2.58 ± 0.01         | 3.54                                                             | 0.2             |                              |

[a] N: coordination number; [b] R: distance between adsorber and backscatter atoms; [c] σ<sup>2</sup>: Debye-Waller factor; [d] M: Ti or Ni.

We know that the basic single scattering formula of EXAFS can be written in the following form: <sup>8</sup>

$$\chi(k) = \sum_j N_j S_0^2 F_j(k) \cdot \frac{1}{kR_j^2} \cdot e^{-2\sigma_j^2 k^2} \cdot e^{-2R_j/\lambda(k)} \cdot \sin[2kR_j + \phi_j^l(k)]$$

Among them, the physical quantity N<sub>j</sub> and R<sub>j</sub> has been discussed above, and the Debye-Waller factor σ<sup>2</sup> is also worth paying attention to, which is related to the disorder in the system. The so-called disorder is the scattering atom position deviates from R<sub>j</sub>, and this deviation will cause the absorption peak to broaden,<sup>9</sup> which included thermal disorder caused by thermal vibration and structural disorder brought by structural distortion (σ<sup>2</sup> = σ<sup>2</sup><sub>T</sub> + σ<sup>2</sup><sub>S</sub>).<sup>8</sup> Under the same test conditions of temperature, the variation of σ<sup>2</sup> might partially account for the the disorder of crystal structure in atomic size.

**Table S2.** Local structure parameters around Ni estimated by EXAFS analysis.

| Sample                                         | Shell                 | N <sup>[a]</sup> | R[Å] <sup>[b]</sup> | $\sigma^2[10^{-3}\text{Å}^2]$ <sup>[c]</sup> | $\Delta E_0$ | R-factor<br>(10 <sup>-3</sup> ) |
|------------------------------------------------|-----------------------|------------------|---------------------|----------------------------------------------|--------------|---------------------------------|
| NiTiGa-LDHs                                    | Ni-O                  | 6.0              | 1.57 ± 0.01         | 5.02                                         | -0.1         | 10.98                           |
|                                                | Ni-O-M <sup>[d]</sup> | 6.0              | 2.71 ± 0.01         | 5.11                                         | -0.2         |                                 |
| NiTiGa-MMO                                     | Ni-O                  | 5.9              | 1.57 ± 0.01         | 5.47                                         | 0.3          | 10.66                           |
|                                                | Ni-O-M                | 5.7              | 2.56 ± 0.01         | 5.95                                         | 0.2          |                                 |
| TiO <sub>x</sub> @NiGa-LDHs                    | Ni-O                  | 5.7              | 1.54 ± 0.01         | 6.42                                         | -0.5         | 11.35                           |
|                                                | Ni-O-M                | 5.8              | 2.56 ± 0.01         | 6.03                                         | -0.7         |                                 |
| NiO(Ti)/Ti <sub>3</sub> O <sub>5</sub> (Ni,Ga) | Ni-O                  | 5.9              | 1.63 ± 0.01         | 6.41                                         | 0.5          | 11.85                           |
|                                                | Ni-O-Ni               | 5.9              | 2.59 ± 0.01         | 6.17                                         | 0.7          |                                 |
| NiO                                            | Ni-O                  | 6.0              | 1.61 ± 0.01         | 5.15                                         | 0.1          | 8.67                            |
|                                                | Ni-O-Ni               | 6.0              | 2.51 ± 0.01         | 5.06                                         | 0.2          |                                 |

[a] N: coordination number; [b] R: distance between adsorber and backscatter atoms; [c]  $\sigma^2$ : Debye-Waller factor; [d] M: Ni or Ti.

**Table S3.** Photocatalytic test results for the systems irradiated by UV-vis light for 5 h.

| photocatalyst                                  | The yields<br>of CO<br>( $\mu\text{mol/g}\cdot\text{h}$ ) | The<br>yields of<br>CH <sub>4</sub> | TCEN <sup>[a]</sup><br>( $\mu\text{mol/mg}$ ) | Activity<br>improvement<br>rate <sup>[b]</sup> (%) | Apparent<br>quantum<br>efficiency <sup>[c]</sup><br>(AQE, %) |
|------------------------------------------------|-----------------------------------------------------------|-------------------------------------|-----------------------------------------------|----------------------------------------------------|--------------------------------------------------------------|
| NiTiGa-LDHs                                    | 367.3819                                                  | 100.684                             | 51.3412                                       | 0                                                  | 1.1276                                                       |
| NiTiGa-MMO                                     | 517.1104                                                  | 110.51                              | 63.9434                                       | 24.5459                                            | 2.3572                                                       |
| NiO(Ti)/Ti <sub>3</sub> O <sub>5</sub> (Ni,Ga) | 2560.0957                                                 | 251.8652                            | 237.8371                                      | 362.2481                                           | 10.2369                                                      |
| Pure NiO                                       | 35.3819                                                   | 14.684                              | 6.2745                                        | -                                                  | 0.05537                                                      |
| Pure Ti <sub>3</sub> O <sub>5</sub>            | 31.3819                                                   | 11.684                              | 5.2078                                        | -                                                  | 0.023334                                                     |
| NiO + Ti <sub>3</sub> O <sub>5</sub> mixture   | 48.3819                                                   | 34.684                              | 12.4745                                       | 13.9532                                            | 0.01602                                                      |

The potoreduction CO<sub>2</sub> results can be calculation by equation below:

$$[a] \text{TCEN} = \frac{\sum (n_{\text{production}} \times n_{\text{electrons}})}{m_{\text{cat.}}}$$

TCEN was represented the total number of electrons actually consumed in photocatalytic CO<sub>2</sub> reduction,  $n_{\text{production}}$  and  $n_{\text{electrons}}$  were the yields of actual product of CO<sub>2</sub> reduction and the moles of electrons reacted to form a mole product (CO:  $n_{\text{electrons}} = 2$ ; CH<sub>4</sub>:  $n_{\text{electrons}} = 8$ ), respectively.

The  $n_{\text{(CH}_4\text{)}}$  and  $n_{\text{(CO)}}$  represented the yields of CH<sub>4</sub> and CO.

$$\text{Activity improvement rate (\%)} = \frac{\text{TCEN}(\text{catalysts}) - \text{TCEN}(\text{NiTiGa-LDH})}{\text{TCEN}(\text{NiTiGa-LDH})} \times 100\%$$

[b]

$$[c] \text{AQE} = \frac{\text{CH}_4 \text{ yields } (\mu\text{mol/s}) \times 8 + \text{CO yields } (\mu\text{mol/s}) \times 2}{\text{Photon flux } (\mu\text{mol/s})} \times 100\%$$

where, both, yields of products and photon intensity are in  $\mu\text{mol}$ . Photon intensity can be calculated as follow:<sup>10</sup>

$$\text{Photon flux } (\mu\text{mol/s}) = \frac{\text{Intensity of light} \times \text{Wavelength}}{\text{Planck constant} \times \text{Photon density}} \times \frac{\text{Incident area}}{\text{Avogadro's constant}}$$

The intensity of the lamp is represented in  $\text{Wm}^{-2}$ , the light wavelength is in meters (m) and the reactor incident area is calculated in  $\text{m}^2$ . Planck's constant, Photondensity, and Avogadro's number are with values  $6.63 \times 10^{-34} \text{ J}\cdot\text{s}$ ,  $3 \times 10^8 \text{ m}\cdot\text{s}^{-1}$ , and  $6.63 \times 10^{23} \text{ mol}^{-1}$ , respectively.

**Table S4.** The photocatalytic performance of  $\text{CO}_2$  reduction over various defective catalysts.

| Photocatalyst                                  | Mass | Light source                                     | Hydrogen source      | The yield of CO                                      | The yield of $\text{CH}_4$                          | [Ref]     |
|------------------------------------------------|------|--------------------------------------------------|----------------------|------------------------------------------------------|-----------------------------------------------------|-----------|
| NiO(Ti)/ $\text{Ti}_3\text{O}_5(\text{Ni,Ga})$ | 30mg | Xenon lamp of 300 $\text{mW}\cdot\text{cm}^{-2}$ | $\text{H}_2\text{O}$ | 2560.096 $\mu\text{mol/g}_{\text{cat}}\cdot\text{h}$ | 251.866 $\mu\text{mol/g}_{\text{cat}}\cdot\text{h}$ | This work |
| BiOBr                                          | 30mg | Xenon lamp of 300 $\text{mW}\cdot\text{cm}^{-2}$ | $\text{H}_2\text{O}$ | 122.38 $\mu\text{mol/g}_{\text{cat}}\cdot\text{h}$   | —                                                   | 11        |
| $\text{CuIn}_5\text{S}_8$                      | 10mg | 300 W arc lamp with 420 nm filter                | $\text{H}_2\text{O}$ | —                                                    | 7.8 $\mu\text{mol/g}_{\text{cat}}\cdot\text{h}$     | 12        |
| $\text{ZnIn}_2\text{S}_4$                      | 30mg | 300 W Xenon lamp ( $\lambda > 420 \text{ nm}$ )  | $\text{H}_2\text{O}$ | 33.2 $\mu\text{mol/g}_{\text{cat}}\cdot\text{h}$     | —                                                   | 13        |
| BiOCl                                          | 5mg  | 300 W Xenon lamp ( $\lambda > 420 \text{ nm}$ )  | $\text{H}_2\text{O}$ | 14.5 $\mu\text{mol/g}_{\text{cat}}\cdot\text{h}$     | —                                                   | 14        |
| $\text{TiO}_{2-x}$                             | 50mg | 300 W Xenon lamp                                 | $\text{H}_2\text{O}$ | —                                                    | 41.8 $\mu\text{mol/g}_{\text{cat}}\cdot\text{h}$    | 15        |
| CuCdS                                          | 50mg | 300 W Xenon lamp ( $\lambda > 420 \text{ nm}$ )  | $\text{H}_2\text{O}$ | 8.5 $\mu\text{mol/g}_{\text{cat}}\cdot\text{h}$      | 0.7 $\mu\text{mol/g}_{\text{cat}}\cdot\text{h}$     | 16        |

**Table S5.** The ion content was determined semi-quantitatively by ISI-XPS.

|              | Relative sensitivity factor (RSF, $S_i$ ) | Condition | Original peak area (Intensity, $I_o$ ) |                  | Fitting peak area (Intensity, $I_i$ ) | Relative amount <sup>[a]</sup> |
|--------------|-------------------------------------------|-----------|----------------------------------------|------------------|---------------------------------------|--------------------------------|
| Ni $p_{3/2}$ | 4.044                                     | Dark      | 83169.9                                | $\text{Ni}^{3+}$ | 43652.4                               | 52.5%                          |
|              |                                           |           |                                        | $\text{Ni}^{2+}$ | 55778.3                               | 67.1%                          |
|              |                                           | Light     | 74266.4                                | $\text{Ni}^{3+}$ | 45003.1                               | 60.6%                          |
|              |                                           |           |                                        | $\text{Ni}^{2+}$ | 56052.4                               | 65.5%                          |
| Ti $p_{3/2}$ | 2.001                                     | Dark      | 38057.6                                | $\text{Ti}^{4+}$ | 27570.1                               | 72.4%                          |
|              |                                           |           |                                        | $\text{Ti}^{3+}$ | 11928.2                               | 31.3%                          |
|              |                                           | Light     | 36858.9                                | $\text{Ti}^{4+}$ | 21279.1                               | 57.7%                          |

|      |      |       |                  |         |       |
|------|------|-------|------------------|---------|-------|
|      |      |       | Ti <sup>3+</sup> | 16137.9 | 43.8% |
|      |      |       | O <sub>ab</sub>  | 27626.1 | 15.1% |
|      |      | Dark  | O <sub>v</sub>   | 72570.5 | 39.8% |
| O 1s | 0.78 |       | O <sub>lat</sub> | 81638.6 | 44.8% |
|      |      |       | O <sub>ab</sub>  | 29339.7 | 14.6% |
|      |      | Light | O <sub>v</sub>   | 98286.5 | 48.8% |
|      |      |       | O <sub>lat</sub> | 57464.0 | 28.6% |

[a] Relative amount =  $I_i / I_o$ : The ratio of ionic strength to total area after fitting.

**Table S6.** the ratio of their ion concentrations of NiO(Ti)/Ti<sub>3</sub>O<sub>5</sub>(Ni,Ga) in light or dark.

|                                                |       | The ratio of ion concentrations |      |
|------------------------------------------------|-------|---------------------------------|------|
| NiO(Ti)/Ti <sub>3</sub> O <sub>5</sub> (Ni,Ga) | Dark  | $n_{Ni^{2+}}:n_{Ti^{4+}}$       | 1.00 |
|                                                |       | $n_{Ni^{3+}}:n_{Ti^{3+}}$       | 1.81 |
|                                                |       | $n_{Ni^{2+}}:n_{Ni^{3+}}$       | 1.28 |
|                                                |       | $n_{Ti^{4+}}:n_{Ti^{3+}}$       | 4.62 |
|                                                | Light | $n_{Ni^{2+}}:n_{Ti^{4+}}$       | 1.32 |
|                                                |       | $n_{Ni^{3+}}:n_{Ti^{3+}}$       | 1.37 |
|                                                |       | $n_{Ni^{2+}}:n_{Ni^{3+}}$       | 1.35 |
|                                                |       | $n_{Ti^{4+}}:n_{Ti^{3+}}$       | 1.32 |

For two elements *i* and *j* in a solid sample, if their sensitivity factors  $S_i$  and  $S_j$  are known and their specific spectral line intensities  $I_i$  and  $I_j$  are measured, the ratio of their atomic concentrations is:  $n_i:n_j = (I_i/S_i):(I_j/S_j)$ , and thus the relative content can be obtained.<sup>17</sup>

Calculation ratio of ion concentration of NiO(Ti)/Ti<sub>3</sub>O<sub>5</sub>(Ni,Ga) in light as the Ni<sup>2+</sup> and Ti<sup>4+</sup> for example:

$$n_{Ni^{2+}}:n_{Ti^{4+}} = (I_{Ni^{2+}}/S_{Ni^{2+}}):(I_{Ti^{4+}}/S_{Ti^{4+}}) = (56052.4/4.004):(21279.1/2.001) = 1.32$$

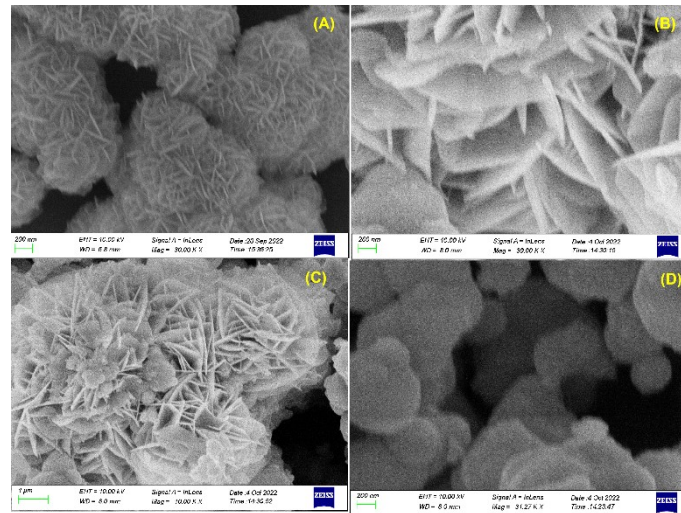

**Figure S1.** The scanning electron microscope images of catalysts (A) NiTiGa-LDHs; (B) NiTiGa-MMO. (C) TiO<sub>x</sub>@NiGa-LDHs. (D) NiO(Ti)/Ti<sub>3</sub>O<sub>5</sub>(Ni,Ga).



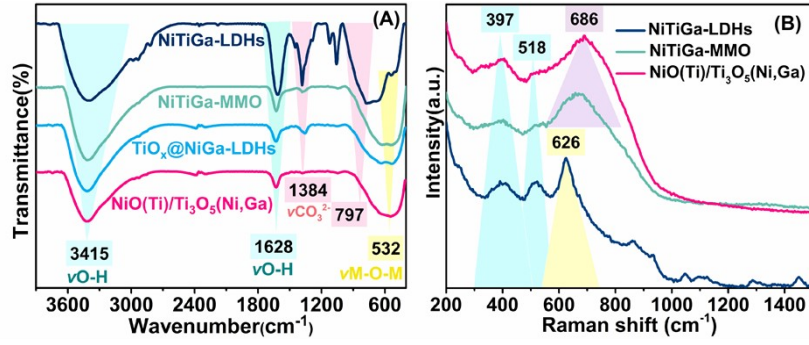

**Figure S2.** (A) Fourier transform infrared spectra (FTIR) of NiTiGa-LDHs, NiTiGa-MMO,  $\text{TiO}_x$ @NiGa-LDHs, and NiO(Ti)/ $\text{Ti}_3\text{O}_5$ (Ni,Ga). (B) Raman spectra of NiTiGa-LDHs, NiTiGa-MMO,  $\text{TiO}_x$ @NiGa-LDHs, and NiO(Ti)/ $\text{Ti}_3\text{O}_5$ (Ni,Ga) by with 532 nm laser excitation..

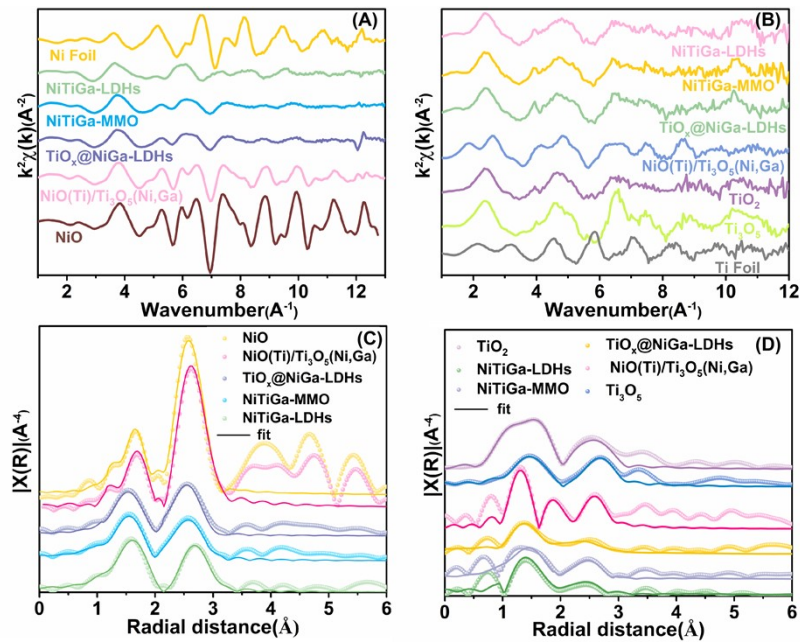

**Figure S3.** (A-B) oscillation function  $k^3\chi(k)$  of the Ti K-edge and Ni K-edge in XAFS; (C-D) magnitude of  $k^3$ -weighted FT and corresponding fitting of Ni K-edge and Ti K-edge.

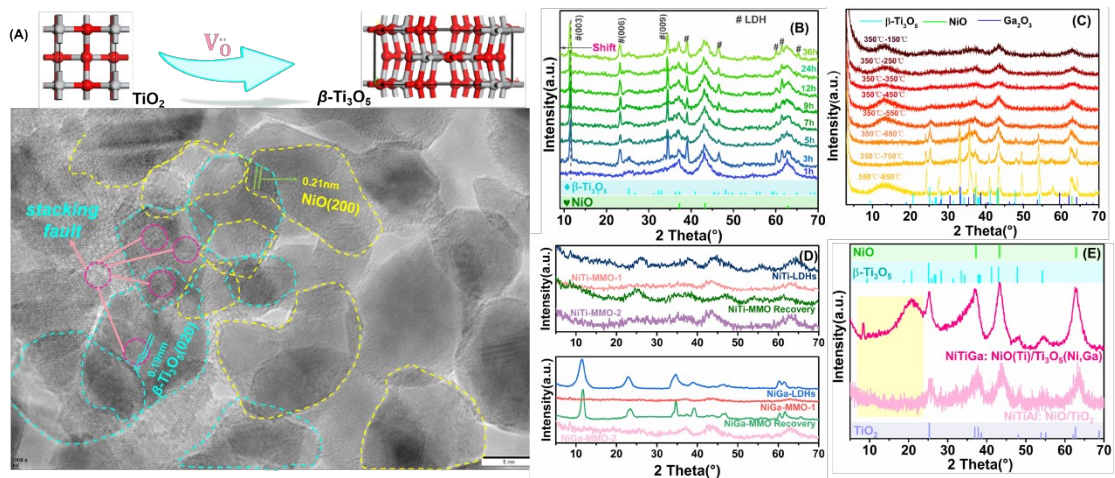

**Figure S4.** (A) HRTEM of NiO(Ti)/ $\text{Ti}_3\text{O}_5$ (Ni,Ga). XRD patterns of (B) the  $\text{TiO}_x$ @NiGa-LDHs was recovered at

different time. (C) the  $\text{TiO}_x@\text{NiGa-LDHs}$  was calcined at different temperature. (D) the control group of NiTi-LDHs and NiGa-LDHs. (E) the control group of NiTiGa-LDHs and NiTiAl-LDHs.

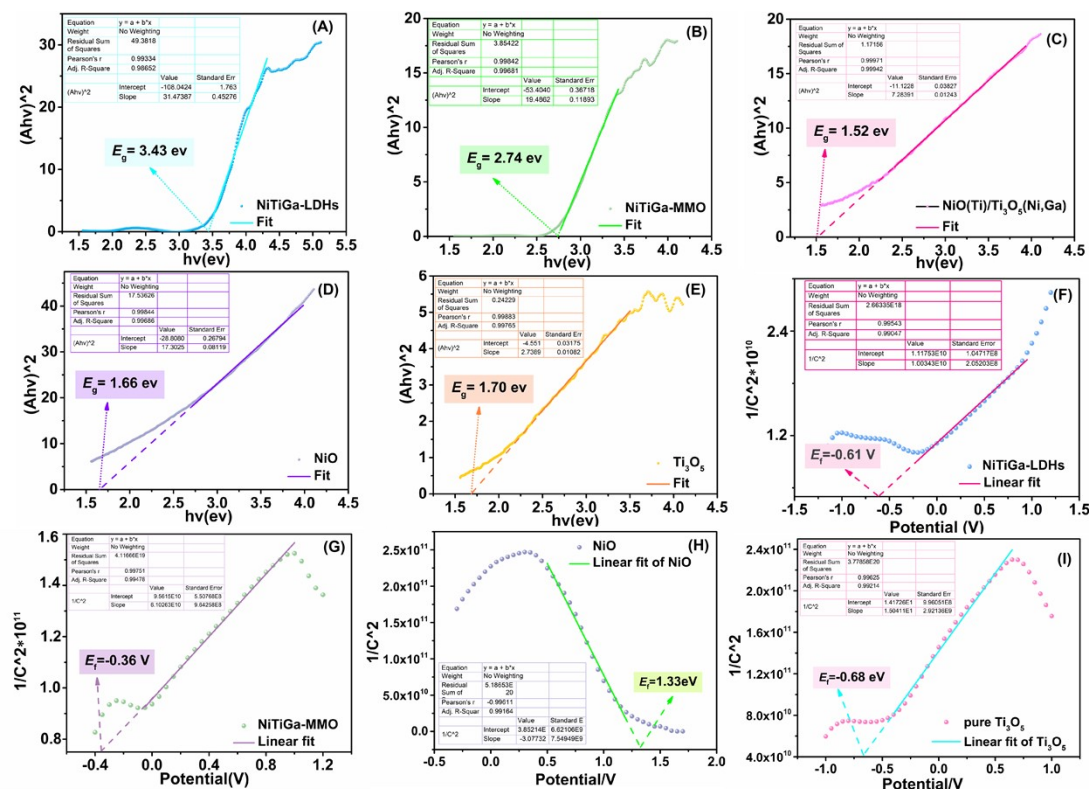

**Figure S5.** (A-E) The UV-vis diffuse reflectance spectra were fitted with Kubelka-Munk formula and Tauc's plot to estimate the band gap. Mott-Schottky plot of the (F) NiTiGa-LDHs, (G) NiTiGa-MMO, (H) pure NiO, and (I)  $\text{Ti}_3\text{O}_5$ .

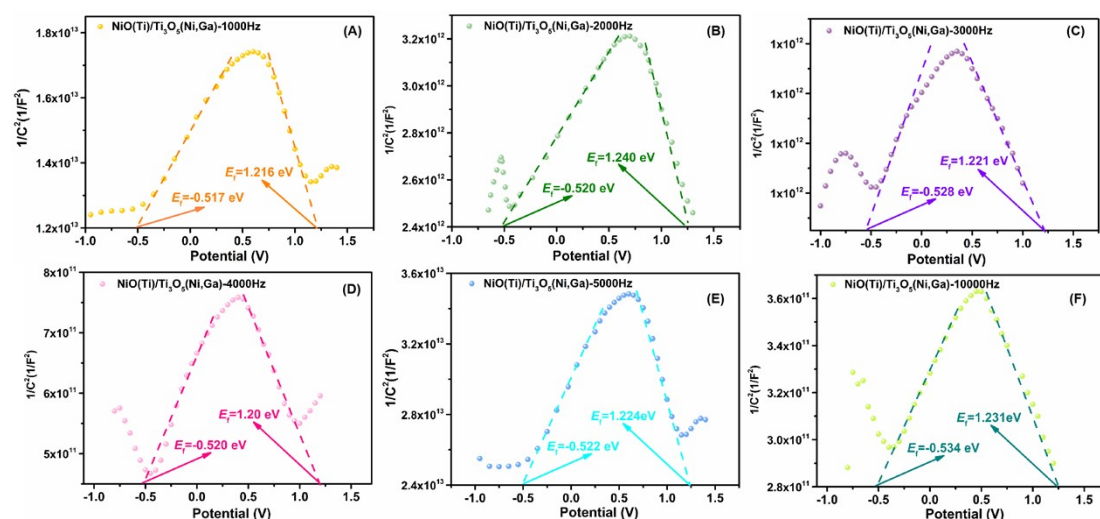

**Figure S6.** MS curves of  $\text{NiO}(\text{Ti})/\text{Ti}_3\text{O}_5(\text{Ni,Ga})$  at different frequencies (A) 1000 Hz, (B) 2000 Hz, (C) 3000 Hz, (D) 4000 Hz, (E) 5000 Hz, (F) 10000 Hz.

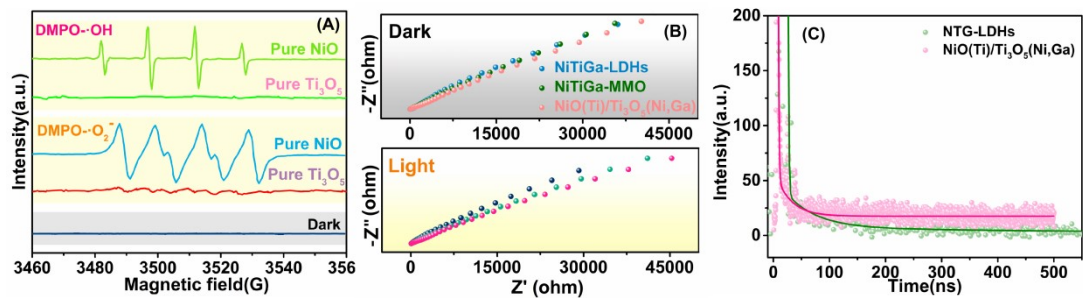

**Figure S7.** (A) EPR of pure NiO and Ti<sub>3</sub>O<sub>5</sub> added DMPO to test the ·O<sub>2</sub><sup>-</sup> and ·OH signals at room temperature. (B) The EIS of the NiTiGa-LDHs, NiTiGa-MMO, and NiO(Ti)/Ti<sub>3</sub>O<sub>5</sub>(Ni,Ga). (C) The TRPL of NiTiGa-LDHs and NiO(Ti)/Ti<sub>3</sub>O<sub>5</sub>(Ni,Ga).

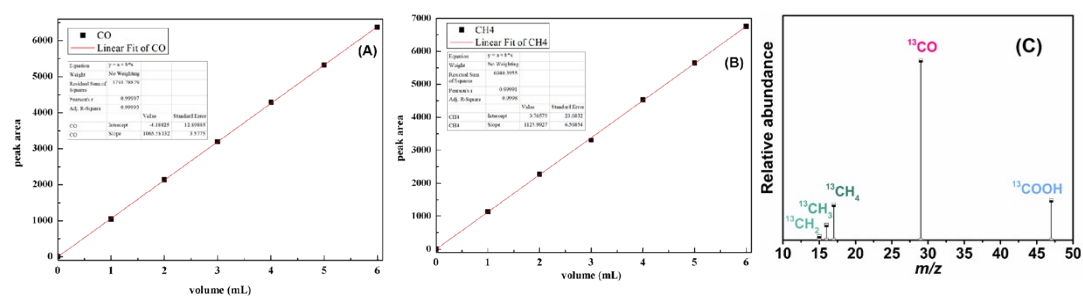

**Figure S8.** GC standard curve for the quantitative determination of pure (A) CO and (B) CH<sub>4</sub> by external standard.

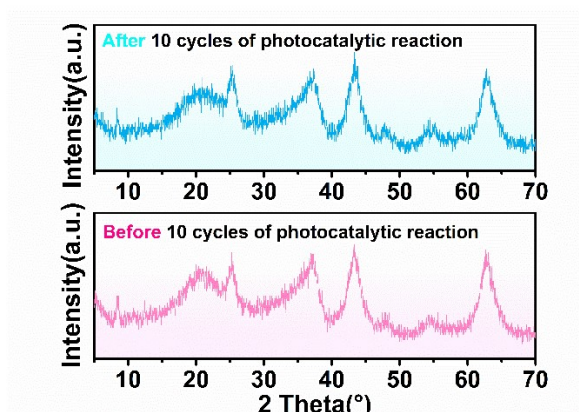

**Figure S9.** The XRD of IIBH NiO(Ti)/Ti<sub>3</sub>O<sub>5</sub>(Ni,Ga) carried out for 60 h.

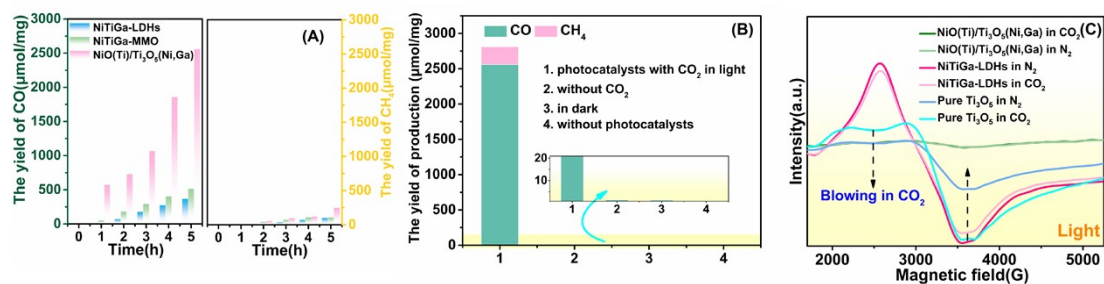

**Figure S10.** (A) Photocatalytic control experiments. (B) Photocatalytic blank experiments. (C) EPR of NiTiGa-LDHs, NiO(Ti)/Ti<sub>3</sub>O<sub>5</sub>(Ni,Ga), and pure Ti<sub>3</sub>O<sub>5</sub> at 200 - 400 nm light for 20 min with CO<sub>2</sub> or N<sub>2</sub>.

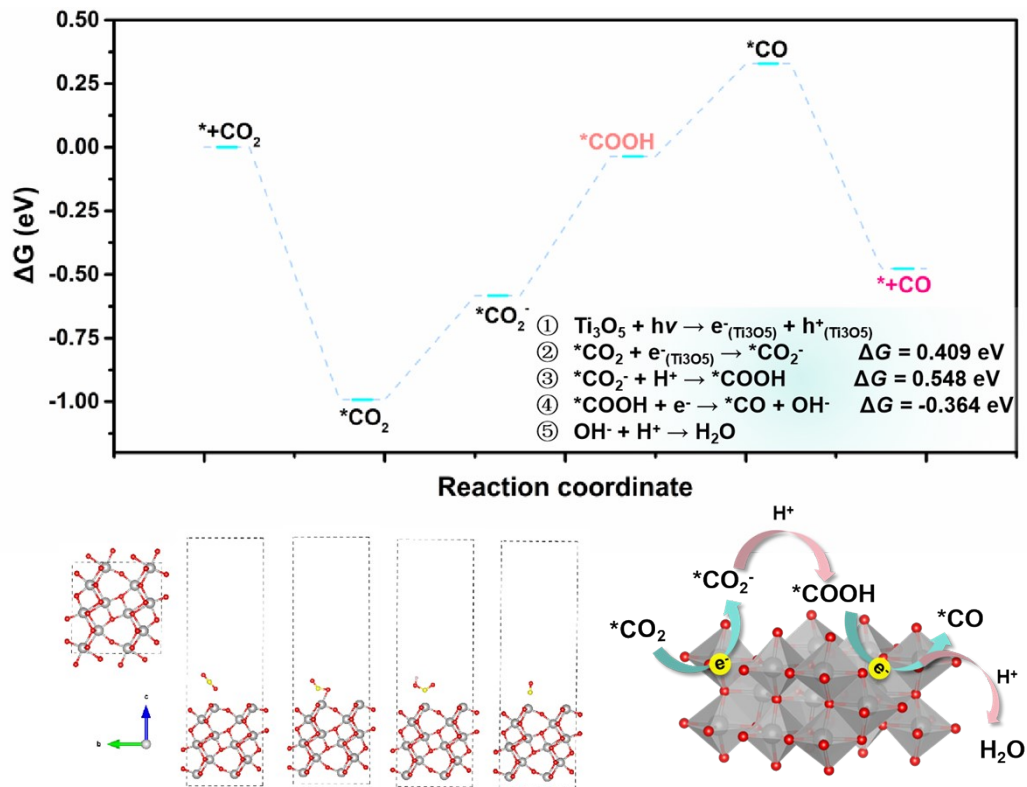

**Figure S11.** The DFT calculations were carried out to demonstrate how the Gibbs free energy changed ( $\Delta G$ ) in the  $\text{Ti}_3\text{O}_5$  area in relation to the  $\text{CO}_2$  reduction process.

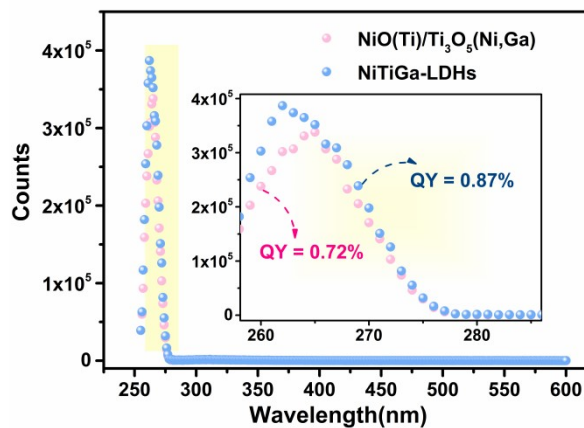

**Figure S12.** The absolute fluorescence quantum yields in the excitation range of 255 ~ 275 nm, probing the the range of 275 ~ 600 nm about  $\text{NiTiGa-LDHs}$  and  $\text{NiO}(\text{Ti})/\text{Ti}_3\text{O}_5(\text{Ni,Ga})$ .

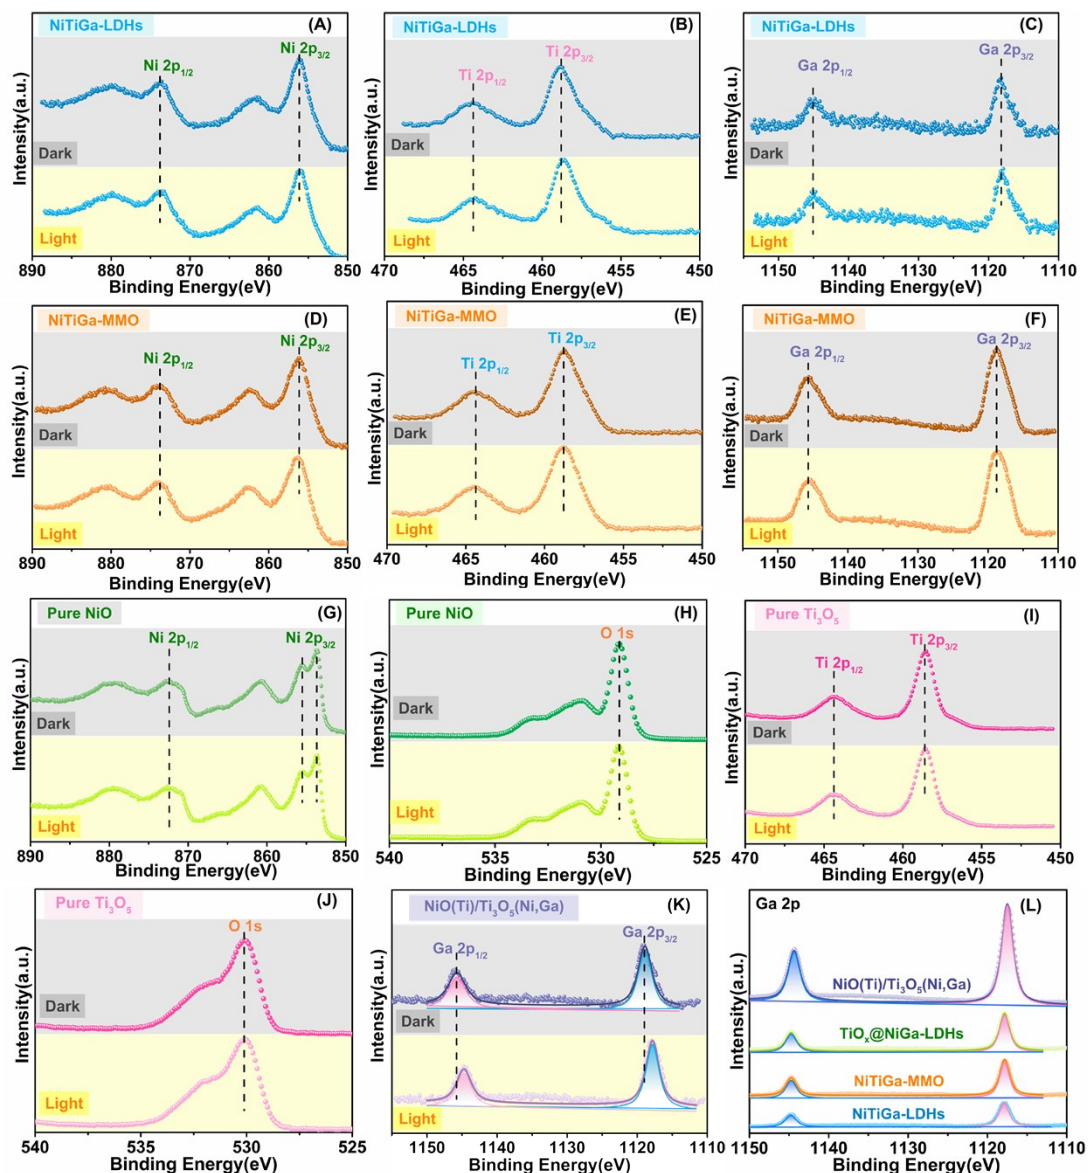

**Figure S13.** The ISI-XPS spectra of NiTiGa-LDHs for (A) Ni 2p. (B) Ti 2p. (C) Ga 2p. ISI-XPS spectra of NiTiGa-MMO for (D) Ni 2p. (E) Ti 2p. (F) Ga 2p. ISI-XPS spectra of pure NiO for (G) Ni 2p. (H) O 1s. ISI-XPS spectra of pure  $\text{Ti}_3\text{O}_5$  for (I) Ti 2p. (J) O 1s. (K) ISI-XPS spectra of NiO(Ti)/ $\text{Ti}_3\text{O}_5(\text{Ni,Ga})$  for Ga 2p. (L) The XPS spectra of NiTiGa-LDHs, NiTiGa-MMO,  $\text{TiO}_x@$ NiGa-LDHs, and NiO(Ti)/ $\text{Ti}_3\text{O}_5(\text{Ni,Ga})$  for Ga 2p. (Dark: X-ray, Light: UV-vis light with X-ray)

## Reference:

1. G. Kresse and J. Furthmüller, *Physical Review B*, 1996, **54**, 11169-11186.
2. J. B. Neaton and N. W. Ashcroft, *Nature*, 1999, **400**, 141-144.
3. J. P. Perdew, K. Burke and M. Ernzerhof, *Physical Review Letters*, 1996, **77**, 3865-3868.
4. G. Kresse and D. Joubert, *Physical Review B*, 1999, **59**, 1758-1775.
5. P. E. Blöchl, *Physical Review B*, 1994, **50**, 17953-17979.
6. S. Jütten and T. Bredow, *The Journal of Physical Chemistry C*, 2023, **127**, 10445-10452.
7. Y. Li, W. Su, Y. Yang, L. Bai, J. Lu, W. Zhang and S. Wei, *Applied Catalysis B: Environmental*, 2024, **341**, 123282.

8. B. Ravel and M. Newville, *Journal of Synchrotron Radiation*, 2005, **12**, 537-541.
9. P. Eisenberger and B. M. Kincaid, *Science*, 1978, **200**, 1441-1447.
10. H. Kumagai, Y. Tamaki and O. Ishitani, *Accounts of Chemical Research*, 2022, **55**, 978-990.
11. Q. Yang, Y. Wang, Q. Tian, X. Li, A. Pan, M. Zhao, Y. Zhu, T. Wu and G. Fang, *Journal of Materials Chemistry A*, 2024, DOI: 10.1039/D3TA07981C.
12. X. Li, Y. Sun, J. Xu, Y. Shao, J. Wu, X. Xu, Y. Pan, H. Ju, J. Zhu and Y. Xie, *Nature Energy*, 2019, **4**, 690-699.
13. X. Jiao, Z. Chen, X. Li, Y. Sun, S. Gao, W. Yan, C. Wang, Q. Zhang, Y. Lin, Y. Luo and Y. Xie, *Journal of the American Chemical Society*, 2017, **139**, 7586-7594.
14. S. Cheng, Z. Sun, K. H. Lim, T. Zhang, E. Hondo, T. Du, L. Liu, M. Judd, N. Cox, Z. Yin, G. K. Li and S. Kawi, *ACS Applied Nano Materials*, 2023, **6**, 3608-3617.
15. H. Deng, X. Zhu, Z. Chen, k. Zhao and G. Cheng, *Carbon Letters*, 2022, **32**, 1671-1680.
16. H. Cao, J. Xue, Z. Wang, J. Dong, W. Li, R. Wang, S. Sun, C. Gao, Y. Tan, X. Zhu and J. Bao, *Journal of Materials Chemistry A*, 2021, **9**, 16339-16344.
17. X. Xu, D. Chen, Z. Yi, M. Jiang, L. Wang, Z. Zhou, X. Fan, Y. Wang and D. Hui, *Langmuir*, 2013, **29**, 5573-5580.
